# Supplementary material
Source: MDPI journal article supplement (https://www.mdpi.com/2077-1312/11/7/1375)
Supplement: s1 [file s1]

# Provenance of the Lower Jurassic Badaowan and Sangonghe Formations in Dongdaohaizi Depression, Junggar Basin and its Constraint on the Karamaili Ocean

Gao Yangjun, Zhang Guanlong, Li Songtao, Guo Ruichao, Zeng Zhiping, Cheng Shiwei, Xue Zelei, Li Ling, Zhou Huilian, Liu Shengqian and Li Furong

**Table S1.** Components and contents of Badaowan and Sangonghe Formation samples in the Dongdaohaizi Depression.

| No.   | Starta                        | Q     |       | F     |       | L     |       | Lt    | Lt    |
|-------|-------------------------------|-------|-------|-------|-------|-------|-------|-------|-------|
|       |                               | Qm    | Qp    | Q=Qt  |       | Lv    | Ls    |       |       |
| C1-1  | J <sub>1b3</sub>              | 24.34 | 16.38 | 40.72 | 17.27 | 7.43  | 34.58 | 42.02 | 58.39 |
| C1-2  |                               | 41.45 | 7.05  | 48.49 | 22.96 | 6.76  | 21.79 | 28.55 | 35.60 |
| C1-3  |                               | 43.40 | 8.75  | 52.15 | 8.03  | 5.89  | 33.93 | 39.82 | 48.57 |
| C1-4  |                               | 38.72 | 10.73 | 49.45 | 17.22 | 6.45  | 26.88 | 33.33 | 44.06 |
| C1-5  |                               | 27.35 | 15.85 | 43.20 | 4.01  | 9.45  | 43.34 | 52.79 | 68.64 |
| C1-6  |                               | 36.62 | 16.28 | 52.90 | 12.73 | 2.25  | 32.12 | 34.37 | 50.65 |
| C1-7  |                               | 50.07 | 5.94  | 56.02 | 7.39  | 4.31  | 32.28 | 36.59 | 42.53 |
| C1-8  |                               | 24.78 | 15.23 | 40.01 | 5.53  | 5.57  | 48.89 | 54.46 | 69.69 |
| C1-9  |                               | 33.58 | 9.17  | 42.76 | 25.98 | 2.08  | 29.19 | 31.26 | 40.44 |
| C1-10 |                               | 36.71 | 10.92 | 47.63 | 5.46  | 2.77  | 44.14 | 46.91 | 57.83 |
| C3-1  | J <sub>1b2</sub>              | 36.52 | 11.21 | 47.74 | 17.02 | 0.38  | 35.62 | 35.25 | 46.46 |
| C3-2  |                               | 39.41 | 15.05 | 54.46 | 3.35  | 7.68  | 34.51 | 42.20 | 57.24 |
| C3-3  |                               | 41.83 | 12.63 | 54.46 | 8.38  | 6.74  | 30.43 | 37.17 | 49.80 |
| C3-4  |                               | 27.79 | 18.96 | 46.75 | 11.04 | 4.30  | 37.91 | 42.21 | 61.17 |
| C3-5  |                               | 29.76 | 9.60  | 39.36 | 7.14  | 14.08 | 39.42 | 53.50 | 63.10 |
| C3-6  |                               | 25.10 | 10.21 | 35.32 | 17.78 | 5.25  | 41.65 | 46.90 | 57.11 |
| C3-7  |                               | 5.79  | 27.80 | 33.59 | 11.40 | 6.58  | 48.44 | 55.01 | 82.81 |
| C3-8  |                               | 33.72 | 8.18  | 41.90 | 10.92 | 10.21 | 36.97 | 47.18 | 55.36 |
| C3-9  |                               | 32.90 | 11.43 | 44.33 | 16.13 | 4.71  | 34.84 | 39.54 | 50.97 |
| C3-10 |                               | 26.05 | 11.05 | 37.10 | 10.22 | 6.81  | 45.86 | 52.67 | 63.72 |
| C3-11 | J <sub>1b1</sub>              | 37.79 | 11.81 | 49.60 | 5.63  | 9.76  | 35.02 | 44.78 | 56.59 |
| C3-12 |                               | 44.08 | 7.68  | 51.76 | 22.85 | 3.07  | 22.33 | 25.40 | 33.07 |
| C3-13 |                               | 35.81 | 15.65 | 51.46 | 5.93  | 1.67  | 40.95 | 42.62 | 58.27 |
| C3-14 |                               | 44.42 | 12.10 | 56.52 | 20.08 | 1.63  | 21.77 | 23.40 | 35.51 |
| C3-15 |                               | 24.82 | 8.88  | 33.70 | 19.19 | 7.30  | 39.81 | 47.12 | 55.99 |
| C3-16 |                               | 21.64 | 15.13 | 36.77 | 17.50 | 9.05  | 36.69 | 45.74 | 60.86 |
| C3-17 |                               | 26.46 | 11.18 | 37.63 | 15.17 | 0.34  | 46.86 | 47.20 | 58.38 |
| C3-18 |                               | 28.11 | 12.44 | 40.55 | 11.21 | 11.87 | 36.37 | 48.24 | 60.68 |
| C3-19 |                               | 49.48 | 4.48  | 53.96 | 23.16 | 6.03  | 16.85 | 22.88 | 27.36 |
| C3-20 |                               | 43.06 | 13.48 | 56.54 | 3.65  | 6.78  | 33.03 | 39.81 | 53.29 |
| C1-11 | J <sub>1s2</sub> <sup>2</sup> | 19.56 | 15.60 | 35.16 | 13.72 | 9.34  | 41.78 | 51.12 | 66.72 |
| C1-12 |                               | 22.13 | 15.53 | 37.66 | 10.06 | 10.35 | 41.94 | 52.29 | 67.82 |
| C1-13 |                               | 28.80 | 16.26 | 45.06 | 13.92 | 7.74  | 33.28 | 41.02 | 57.28 |
| C1-14 |                               | 31.91 | 10.47 | 42.38 | 5.32  | 7.30  | 45.00 | 52.30 | 62.77 |

|       |                               |       |       |       |       |       |       |       |       |
|-------|-------------------------------|-------|-------|-------|-------|-------|-------|-------|-------|
| C1-15 |                               | 33.79 | 8.41  | 42.20 | 7.40  | 5.87  | 44.52 | 50.39 | 58.81 |
| C1-16 |                               | 26.51 | 13.35 | 39.86 | 9.73  | 12.38 | 38.03 | 50.40 | 63.76 |
| C1-17 |                               | 27.52 | 13.55 | 41.06 | 6.48  | 0.56  | 51.90 | 52.46 | 66.00 |
| C1-18 |                               | 32.57 | 10.14 | 42.71 | 6.84  | 11.34 | 39.11 | 50.45 | 60.59 |
| C1-19 |                               | 38.82 | 16.06 | 54.88 | 10.24 | 2.02  | 32.87 | 34.89 | 50.94 |
| C1-20 |                               | 42.98 | 5.86  | 48.84 | 20.89 | 8.01  | 22.25 | 30.27 | 36.13 |
| C1-21 |                               | 35.39 | 6.56  | 41.95 | 18.92 | 5.89  | 33.24 | 39.12 | 45.68 |
| C1-22 |                               | 50.36 | 4.21  | 54.58 | 22.36 | 6.56  | 16.51 | 23.07 | 27.28 |
| C1-23 |                               | 36.55 | 11.83 | 48.38 | 14.74 | 8.06  | 28.82 | 36.88 | 48.71 |
| C1-24 |                               | 45.13 | 7.29  | 52.42 | 19.45 | 5.27  | 22.86 | 28.13 | 35.42 |
| C1-25 |                               | 25.82 | 15.04 | 40.86 | 23.29 | 5.30  | 30.55 | 35.85 | 50.89 |
| C1-26 | J <sub>1S2</sub> <sup>1</sup> | 14.44 | 20.62 | 35.06 | 7.91  | 1.22  | 58.25 | 57.03 | 77.65 |
| C1-27 |                               | 49.90 | 6.80  | 56.70 | 21.17 | 2.51  | 19.62 | 22.13 | 28.93 |
| C1-28 |                               | 27.68 | 10.61 | 38.29 | 15.13 | 11.62 | 34.95 | 46.58 | 57.19 |
| C1-29 |                               | 16.93 | 22.56 | 39.49 | 5.22  | 8.76  | 46.53 | 55.29 | 77.85 |
| C1-30 |                               | 43.24 | 6.61  | 49.85 | 17.22 | 9.36  | 23.58 | 32.93 | 39.54 |
| C1-31 |                               | 17.08 | 17.12 | 34.20 | 3.50  | 12.02 | 50.27 | 62.30 | 79.41 |
| C1-32 |                               | 18.90 | 23.14 | 42.04 | 12.78 | 3.47  | 41.72 | 45.18 | 68.32 |
| C1-33 |                               | 24.69 | 14.47 | 39.16 | 19.92 | 1.36  | 42.28 | 40.92 | 55.39 |
| C1-34 |                               | 31.35 | 7.92  | 39.26 | 22.88 | 3.90  | 33.95 | 37.85 | 45.77 |
| C1-35 | J <sub>1S1</sub>              | 29.81 | 12.40 | 42.20 | 20.20 | 6.57  | 31.03 | 37.60 | 50.00 |
| C1-36 |                               | 37.70 | 15.10 | 52.80 | 7.64  | 1.62  | 37.93 | 39.56 | 54.66 |
| C1-37 |                               | 22.20 | 20.22 | 42.42 | 21.56 | 0.40  | 36.42 | 36.02 | 56.24 |
| C1-38 |                               | 41.95 | 11.75 | 53.70 | 23.30 | 0.26  | 23.26 | 23.00 | 34.75 |
| C1-39 |                               | 28.08 | 10.53 | 38.62 | 8.28  | 12.83 | 40.28 | 53.10 | 63.64 |
| C1-40 |                               | 26.83 | 16.75 | 43.58 | 7.08  | 0.25  | 49.58 | 49.34 | 66.09 |

Note: Q = total monocrystalline (Qm) and polycrystalline (Qp) quartz grains; F = total potassium feldspar (K) and plagioclase (P) grains; L = aphanitic unstable lithic grains, including sedimentary (Ls), metamorphic (Lm) and volcanic (Lv) fragments.

**Table S2.** LA-ICP-MS zircon U-Pb dating results of sandstones from the Badaowan and Sangonghe formations in Dongdaohaizi Depression, Junggar basin.

| No                        | Th<br>(ppm) | U<br>(ppm) | Th/U | CORRECTED RATIOS                     |         |                                     |         |                                     |         | CORRECTED AGES (Ma)                  |     |                                     |    |                                     |    |
|---------------------------|-------------|------------|------|--------------------------------------|---------|-------------------------------------|---------|-------------------------------------|---------|--------------------------------------|-----|-------------------------------------|----|-------------------------------------|----|
|                           |             |            |      | <sup>207</sup> Pb/ <sup>206</sup> Pb | 1σ      | <sup>207</sup> Pb/ <sup>235</sup> U | 2σ      | <sup>206</sup> Pb/ <sup>238</sup> U | 1σ      | <sup>207</sup> Pb/ <sup>206</sup> Pb | 1σ  | <sup>207</sup> Pb/ <sup>235</sup> U | 1σ | <sup>206</sup> Pb/ <sup>238</sup> U | 2σ |
| Badaowan Formation (C3NL) |             |            |      |                                      |         |                                     |         |                                     |         |                                      |     |                                     |    |                                     |    |
| 1                         | 593         | 628        | 1.02 | 0.05486                              | 0.00180 | 0.28981                             | 0.00914 | 0.04137                             | 0.00040 | 269.00                               | 80  | 262.07                              | 7  | 259.07                              | 3  |
| 2                         | 121         | 201        | 0.62 | 0.06159                              | 0.00238 | 0.55424                             | 0.02273 | 0.06696                             | 0.00072 | 530.04                               | 65  | 437.41                              | 15 | 418.19                              | 5  |
| 3                         | 132         | 221        | 0.62 | 0.05440                              | 0.00230 | 0.35302                             | 0.01411 | 0.04903                             | 0.00057 | 249.37                               | 101 | 301.09                              | 11 | 305.87                              | 4  |
| 4                         | 249         | 206        | 1.21 | 0.05069                              | 0.00200 | 0.34480                             | 0.01352 | 0.04936                             | 0.00061 | 227.85                               | 93  | 300.80                              | 10 | 310.59                              | 4  |
| 5                         | 127         | 71         | 1.97 | 0.12899                              | 0.00301 | 6.40085                             | 0.15722 | 0.37659                             | 0.00384 | 2117.50                              | 44  | 2126.87                             | 22 | 2151.54                             | 18 |
| 6                         | 138         | 158        | 0.88 | 0.05636                              | 0.00247 | 0.54690                             | 0.02348 | 0.07059                             | 0.00081 | 464.86                               | 98  | 442.96                              | 15 | 439.71                              | 5  |
| 7                         | 140         | 544        | 0.26 | 0.05321                              | 0.00172 | 0.32166                             | 0.01064 | 0.04363                             | 0.00045 | 338.95                               | 74  | 283.18                              | 8  | 275.28                              | 3  |
| 8                         | 133         | 209        | 0.64 | 0.05786                              | 0.00184 | 0.66990                             | 0.02103 | 0.08358                             | 0.00076 | 524.11                               | 70  | 520.65                              | 13 | 517.44                              | 5  |
| 9                         | 62          | 583        | 0.11 | 0.05429                              | 0.00134 | 0.46648                             | 0.01184 | 0.06196                             | 0.00058 | 383.39                               | 56  | 388.76                              | 8  | 387.53                              | 4  |
| 10                        | 123         | 67         | 1.84 | 0.12403                              | 0.00292 | 6.21441                             | 0.14694 | 0.36211                             | 0.00356 | 2016.67                              | 42  | 2006.48                             | 21 | 1992.17                             | 17 |
| 11                        | 394         | 320        | 1.23 | 0.05283                              | 0.00190 | 0.37125                             | 0.01293 | 0.05098                             | 0.00056 | 320.43                               | 114 | 320.58                              | 10 | 320.55                              | 3  |
| 12                        | 251         | 220        | 1.14 | 0.05245                              | 0.00224 | 0.36707                             | 0.01527 | 0.05093                             | 0.00058 | 305.62                               | 94  | 317.48                              | 11 | 320.20                              | 4  |
| 13                        | 206         | 391        | 0.53 | 0.04995                              | 0.00187 | 0.31012                             | 0.01134 | 0.04498                             | 0.00049 | 190.82                               | 87  | 274.28                              | 9  | 283.66                              | 3  |
| 14                        | 199         | 325        | 0.61 | 0.05249                              | 0.00193 | 0.33793                             | 0.01193 | 0.04672                             | 0.00050 | 305.62                               | 83  | 295.60                              | 9  | 294.33                              | 3  |
| 15                        | 136         | 218        | 0.69 | 0.06164                              | 0.00257 | 0.57998                             | 0.02477 | 0.07094                             | 0.00092 | 519.21                               | 95  | 461.75                              | 16 | 450.81                              | 6  |
| 16                        | 336         | 327        | 1.03 | 0.05109                              | 0.00224 | 0.28154                             | 0.01251 | 0.03988                             | 0.00042 | 255.62                               | 102 | 251.88                              | 10 | 252.09                              | 3  |
| 17                        | 331         | 799        | 0.41 | 0.05885                              | 0.00139 | 0.65036                             | 0.01526 | 0.07997                             | 0.00079 | 561.15                               | 52  | 508.70                              | 9  | 495.95                              | 5  |
| 18                        | 151         | 252        | 0.64 | 0.05758                              | 0.00201 | 0.56288                             | 0.01944 | 0.07288                             | 0.00098 | 481.55                               | 82  | 450.65                              | 13 | 454.50                              | 6  |
| 19                        | 115         | 195        | 0.59 | 0.05702                              | 0.00231 | 0.51319                             | 0.02104 | 0.06501                             | 0.00069 | 500.04                               | 61  | 420.59                              | 14 | 406.01                              | 4  |

|    |     |      |      |         |         |         |         |         |         |         |     |         |    |         |    |
|----|-----|------|------|---------|---------|---------|---------|---------|---------|---------|-----|---------|----|---------|----|
| 20 | 632 | 740  | 0.85 | 0.05085 | 0.00144 | 0.26932 | 0.00759 | 0.03810 | 0.00035 | 235.25  | 65  | 242.15  | 6  | 241.02  | 2  |
| 21 | 485 | 477  | 1.11 | 0.05142 | 0.00192 | 0.28241 | 0.01020 | 0.04302 | 0.00044 | 198.45  | 87  | 263.26  | 8  | 271.96  | 3  |
| 22 | 144 | 577  | 0.27 | 0.05534 | 0.00178 | 0.33453 | 0.01096 | 0.04625 | 0.00048 | 366.06  | 79  | 291.67  | 9  | 297.30  | 3  |
| 23 | 141 | 226  | 0.62 | 0.05198 | 0.00202 | 0.36759 | 0.01348 | 0.05153 | 0.00064 | 283.40  | 89  | 317.87  | 10 | 323.91  | 4  |
| 24 | 291 | 565  | 0.51 | 0.05579 | 0.00160 | 0.49850 | 0.01440 | 0.06405 | 0.00060 | 442.64  | 58  | 410.68  | 10 | 400.23  | 4  |
| 25 | 44  | 53   | 0.84 | 0.05303 | 0.00404 | 0.33058 | 0.01993 | 0.04623 | 0.00094 | 331.54  | 174 | 290.01  | 15 | 291.32  | 6  |
| 26 | 104 | 213  | 0.53 | 0.05642 | 0.00252 | 0.33723 | 0.01542 | 0.04759 | 0.00066 | 306.29  | 115 | 310.59  | 12 | 297.10  | 4  |
| 27 | 327 | 1615 | 0.22 | 0.09158 | 0.00181 | 2.69146 | 0.05807 | 0.22129 | 0.00241 | 1363.23 | 41  | 1334.65 | 17 | 1317.33 | 12 |
| 28 | 136 | 240  | 0.59 | 0.05911 | 0.00201 | 0.64086 | 0.02148 | 0.08225 | 0.00085 | 520.76  | 84  | 511.84  | 14 | 510.65  | 5  |
| 29 | 29  | 29   | 1.00 | 0.04716 | 0.00576 | 0.30307 | 0.03110 | 0.04490 | 0.00112 | 57.50   | 267 | 268.80  | 24 | 283.16  | 7  |
| 30 | 312 | 1538 | 0.20 | 0.08479 | 0.00171 | 2.53911 | 0.05478 | 0.21485 | 0.00223 | 1310.80 | 39  | 1283.32 | 16 | 1254.60 | 12 |
| 31 | 225 | 414  | 0.56 | 0.05532 | 0.00177 | 0.35069 | 0.01102 | 0.04719 | 0.00050 | 306.29  | 77  | 302.65  | 9  | 300.37  | 3  |
| 32 | 256 | 220  | 1.28 | 0.05475 | 0.00212 | 0.37238 | 0.01393 | 0.05232 | 0.00065 | 243.79  | 99  | 321.86  | 11 | 332.33  | 4  |
| 33 | 388 | 253  | 1.64 | 0.05430 | 0.00237 | 0.34309 | 0.01356 | 0.04811 | 0.00054 | 332.56  | 98  | 304.65  | 11 | 300.65  | 3  |
| 34 | 565 | 598  | 0.94 | 0.05127 | 0.00166 | 0.27866 | 0.00888 | 0.03940 | 0.00037 | 253.77  | 76  | 249.59  | 7  | 249.11  | 2  |
| 35 | 431 | 434  | 0.99 | 0.05107 | 0.00159 | 0.37664 | 0.01223 | 0.05306 | 0.00056 | 242.66  | 75  | 324.56  | 9  | 333.28  | 3  |
| 36 | 147 | 299  | 0.49 | 0.05742 | 0.00222 | 0.53233 | 0.01933 | 0.06692 | 0.00075 | 509.30  | 85  | 433.36  | 13 | 417.55  | 5  |
| 37 | 226 | 250  | 0.90 | 0.06007 | 0.00209 | 0.65195 | 0.02338 | 0.08581 | 0.00097 | 469.66  | 84  | 522.83  | 14 | 546.84  | 6  |
| 38 | 32  | 202  | 0.16 | 0.04972 | 0.00252 | 0.28464 | 0.01412 | 0.04183 | 0.00053 | 188.97  | 117 | 254.33  | 11 | 264.18  | 3  |
| 39 | 405 | 339  | 1.29 | 0.05706 | 0.00204 | 0.38238 | 0.01332 | 0.05506 | 0.00060 | 336.45  | 117 | 339.81  | 10 | 346.19  | 4  |
| 40 | 257 | 227  | 1.13 | 0.05536 | 0.00207 | 0.53541 | 0.01891 | 0.07059 | 0.00090 | 427.83  | 83  | 435.39  | 13 | 439.71  | 5  |
| 41 | 212 | 402  | 0.53 | 0.05219 | 0.00167 | 0.32471 | 0.01030 | 0.04494 | 0.00048 | 294.51  | 72  | 285.52  | 8  | 283.37  | 3  |
| 42 | 140 | 156  | 0.90 | 0.05174 | 0.00253 | 0.30347 | 0.01451 | 0.04268 | 0.00056 | 272.29  | 108 | 269.11  | 11 | 269.40  | 3  |
| 43 | 34  | 208  | 0.17 | 0.05221 | 0.00267 | 0.29318 | 0.01525 | 0.04476 | 0.00056 | 200.31  | 126 | 264.51  | 12 | 272.11  | 4  |
| 44 | 353 | 353  | 1.09 | 0.05314 | 0.00236 | 0.30406 | 0.01338 | 0.04267 | 0.00044 | 268.40  | 109 | 266.99  | 11 | 264.69  | 3  |
| 45 | 259 | 228  | 1.24 | 0.05455 | 0.00237 | 0.37808 | 0.01573 | 0.05449 | 0.00060 | 317.84  | 96  | 336.53  | 12 | 336.21  | 4  |
| 46 | 90  | 125  | 0.78 | 0.05894 | 0.00238 | 0.64786 | 0.02538 | 0.08532 | 0.00097 | 433.38  | 96  | 523.05  | 16 | 523.74  | 6  |
| 47 | 204 | 302  | 0.70 | 0.05612 | 0.00193 | 0.46796 | 0.01560 | 0.06271 | 0.00065 | 394.37  | 77  | 379.43  | 11 | 396.55  | 4  |
| 48 | 109 | 156  | 0.72 | 0.05514 | 0.00260 | 0.39236 | 0.01713 | 0.05393 | 0.00064 | 334.07  | 113 | 332.56  | 13 | 342.18  | 4  |
| 49 | 283 | 262  | 1.11 | 0.05770 | 0.00212 | 0.49360 | 0.01840 | 0.06622 | 0.00074 | 442.05  | 84  | 421.39  | 13 | 417.89  | 5  |
| 50 | 184 | 169  | 1.09 | 0.05426 | 0.00216 | 0.47945 | 0.01877 | 0.06423 | 0.00081 | 388.94  | 89  | 397.70  | 13 | 401.30  | 5  |
| 51 | 74  | 126  | 0.59 | 0.05476 | 0.00270 | 0.47260 | 0.02330 | 0.06263 | 0.00083 | 466.71  | 111 | 392.99  | 16 | 391.59  | 5  |
| 52 | 120 | 200  | 0.64 | 0.06272 | 0.00223 | 0.73116 | 0.02525 | 0.08514 | 0.00098 | 600.87  | 80  | 561.71  | 16 | 552.91  | 6  |
| 53 | 103 | 147  | 0.70 | 0.05252 | 0.00252 | 0.37015 | 0.01648 | 0.05185 | 0.00061 | 309.32  | 109 | 319.76  | 12 | 325.88  | 4  |
| 54 | 190 | 280  | 0.68 | 0.05396 | 0.00182 | 0.43735 | 0.01515 | 0.05861 | 0.00062 | 368.57  | 71  | 368.38  | 11 | 367.18  | 4  |
| 55 | 211 | 243  | 0.87 | 0.05562 | 0.00194 | 0.63296 | 0.02165 | 0.08251 | 0.00090 | 438.94  | 78  | 497.94  | 13 | 511.06  | 5  |
| 56 | 250 | 235  | 1.12 | 0.05872 | 0.00198 | 0.57837 | 0.01807 | 0.07588 | 0.00072 | 495.88  | 77  | 473.08  | 12 | 464.00  | 5  |
| 57 | 147 | 238  | 0.62 | 0.05591 | 0.00194 | 0.52606 | 0.01834 | 0.06811 | 0.00091 | 450.05  | 78  | 429.19  | 12 | 424.77  | 6  |
| 58 | 377 | 243  | 1.55 | 0.05272 | 0.00220 | 0.32367 | 0.01279 | 0.04455 | 0.00050 | 316.73  | 94  | 284.72  | 10 | 280.98  | 3  |
| 59 | 345 | 839  | 0.43 | 0.06120 | 0.00146 | 0.69589 | 0.01633 | 0.08237 | 0.00083 | 606.04  | 53  | 539.23  | 10 | 520.75  | 5  |
| 60 | 131 | 233  | 0.56 | 0.05739 | 0.00196 | 0.61621 | 0.02065 | 0.07759 | 0.00082 | 505.60  | 79  | 487.47  | 13 | 481.74  | 5  |
| 61 | 189 | 179  | 1.17 | 0.05643 | 0.00222 | 0.50822 | 0.01971 | 0.06616 | 0.00084 | 420.06  | 94  | 429.51  | 14 | 417.36  | 5  |
| 62 | 157 | 323  | 0.53 | 0.06087 | 0.00233 | 0.57492 | 0.02049 | 0.06892 | 0.00079 | 524.58  | 89  | 459.36  | 13 | 442.60  | 5  |
| 63 | 452 | 921  | 0.54 | 0.05709 | 0.00135 | 0.52387 | 0.01254 | 0.07002 | 0.00063 | 449.22  | 49  | 435.63  | 9  | 417.13  | 4  |
| 64 | 430 | 853  | 0.50 | 0.05543 | 0.00125 | 0.49893 | 0.01194 | 0.06484 | 0.00058 | 427.83  | 45  | 410.98  | 8  | 404.98  | 4  |
| 65 | 272 | 252  | 1.08 | 0.05496 | 0.00196 | 0.47922 | 0.01752 | 0.06306 | 0.00070 | 409.31  | 80  | 397.54  | 12 | 394.23  | 4  |
| 66 | 100 | 197  | 0.51 | 0.05224 | 0.00245 | 0.32741 | 0.01468 | 0.04576 | 0.00063 | 294.51  | 107 | 287.59  | 11 | 288.45  | 4  |
| 67 | 113 | 192  | 0.59 | 0.05917 | 0.00212 | 0.67700 | 0.02382 | 0.08266 | 0.00090 | 572.26  | 78  | 524.96  | 14 | 511.95  | 5  |
| 68 | 250 | 297  | 0.84 | 0.05320 | 0.00256 | 0.33152 | 0.01576 | 0.04557 | 0.00060 | 344.50  | 105 | 290.72  | 12 | 287.28  | 4  |
| 69 | 134 | 146  | 0.93 | 0.06154 | 0.00238 | 0.73019 | 0.02853 | 0.09292 | 0.00105 | 618.04  | 89  | 576.75  | 18 | 558.28  | 6  |
| 70 | 207 | 344  | 0.64 | 0.05616 | 0.00204 | 0.34807 | 0.01240 | 0.04999 | 0.00053 | 323.95  | 87  | 310.38  | 10 | 314.93  | 3  |
| 71 | 258 | 306  | 0.89 | 0.05586 | 0.00268 | 0.35804 | 0.01671 | 0.04785 | 0.00062 | 365.17  | 112 | 313.98  | 13 | 310.26  | 4  |
| 72 | 457 | 456  | 1.02 | 0.05260 | 0.00163 | 0.39171 | 0.01260 | 0.05677 | 0.00059 | 262.07  | 79  | 337.55  | 10 | 359.94  | 4  |
| 73 | 670 | 785  | 0.90 | 0.05238 | 0.00152 | 0.28817 | 0.00790 | 0.03924 | 0.00038 | 247.01  | 68  | 251.83  | 7  | 253.07  | 2  |
| 74 | 233 | 224  | 1.04 | 0.05646 | 0.00191 | 0.54563 | 0.01754 | 0.07026 | 0.00069 | 472.27  | 74  | 442.13  | 12 | 437.74  | 4  |
| 75 | 306 | 594  | 0.55 | 0.05970 | 0.00173 | 0.52841 | 0.01512 | 0.06790 | 0.00063 | 478.05  | 60  | 435.32  | 10 | 420.24  | 4  |
| 76 | 123 | 114  | 1.17 | 0.05294 | 0.00323 | 0.31458 | 0.02017 | 0.04817 | 0.00077 | 160.59  | 157 | 292.27  | 16 | 306.57  | 5  |
| 77 | 149 | 242  | 0.67 | 0.05354 | 0.00208 | 0.39332 | 0.01402 | 0.05359 | 0.00069 | 300.40  | 95  | 330.58  | 11 | 346.58  | 4  |

|     |     |     |      |         |         |         |         |         |         |        |     |        |    |        |   |
|-----|-----|-----|------|---------|---------|---------|---------|---------|---------|--------|-----|--------|----|--------|---|
| 78  | 128 | 213 | 0.60 | 0.05084 | 0.00217 | 0.32992 | 0.01331 | 0.04714 | 0.00055 | 235.25 | 98  | 289.51 | 10 | 296.96 | 3 |
| 79  | 86  | 118 | 0.73 | 0.05509 | 0.00227 | 0.61118 | 0.02350 | 0.08125 | 0.00095 | 416.72 | 93  | 484.31 | 15 | 503.59 | 6 |
| 80  | 461 | 402 | 1.24 | 0.05895 | 0.00141 | 0.65979 | 0.01632 | 0.08319 | 0.00072 | 465.70 | 59  | 512.11 | 10 | 510.93 | 4 |
| 81  | 77  | 132 | 0.63 | 0.05914 | 0.00289 | 0.51041 | 0.02399 | 0.06513 | 0.00088 | 504.05 | 119 | 424.43 | 17 | 407.25 | 5 |
| 82  | 40  | 66  | 0.62 | 0.05884 | 0.00344 | 0.55082 | 0.03017 | 0.07389 | 0.00118 | 457.42 | 136 | 437.66 | 20 | 443.40 | 7 |
| 83  | 277 | 236 | 1.16 | 0.05923 | 0.00213 | 0.57824 | 0.02005 | 0.07624 | 0.00097 | 449.22 | 89  | 465.87 | 14 | 461.69 | 6 |
| 84  | 435 | 358 | 1.21 | 0.05425 | 0.00186 | 0.34956 | 0.01234 | 0.04646 | 0.00050 | 388.94 | 78  | 304.39 | 9  | 292.74 | 3 |
| 85  | 79  | 382 | 0.22 | 0.05673 | 0.00171 | 0.47272 | 0.01490 | 0.06509 | 0.00064 | 344.23 | 72  | 391.87 | 11 | 410.98 | 4 |
| 86  | 456 | 387 | 1.30 | 0.05859 | 0.00192 | 0.37054 | 0.01283 | 0.04971 | 0.00053 | 420.06 | 83  | 322.65 | 10 | 304.45 | 3 |
| 87  | 462 | 442 | 1.05 | 0.04992 | 0.00179 | 0.27419 | 0.00953 | 0.03984 | 0.00042 | 190.82 | 83  | 246.03 | 8  | 251.81 | 3 |
| 88  | 124 | 139 | 0.89 | 0.05917 | 0.00229 | 0.70892 | 0.02744 | 0.08684 | 0.00097 | 572.26 | 84  | 544.10 | 16 | 536.81 | 6 |
| 89  | 137 | 219 | 0.68 | 0.06018 | 0.00189 | 0.69669 | 0.02272 | 0.09026 | 0.00082 | 555.56 | 74  | 557.10 | 14 | 553.66 | 5 |
| 90  | 31  | 31  | 1.06 | 0.05046 | 0.00599 | 0.32126 | 0.03297 | 0.04760 | 0.00115 | 60.38  | 283 | 287.61 | 26 | 305.81 | 8 |
| 91  | 66  | 612 | 0.11 | 0.05646 | 0.00142 | 0.50380 | 0.01231 | 0.06692 | 0.00062 | 410.22 | 57  | 419.86 | 9  | 403.03 | 4 |
| 92  | 76  | 360 | 0.21 | 0.05302 | 0.00165 | 0.45454 | 0.01433 | 0.06199 | 0.00061 | 327.84 | 70  | 380.46 | 10 | 387.72 | 4 |
| 93  | 48  | 55  | 0.89 | 0.05621 | 0.00429 | 0.35372 | 0.02093 | 0.04946 | 0.00101 | 341.49 | 188 | 310.31 | 16 | 308.80 | 6 |
| 94  | 118 | 107 | 1.10 | 0.04901 | 0.00308 | 0.30541 | 0.01903 | 0.04545 | 0.00072 | 150.09 | 150 | 270.62 | 15 | 286.51 | 4 |
| 95  | 152 | 162 | 0.93 | 0.05536 | 0.00268 | 0.31257 | 0.01567 | 0.04438 | 0.00060 | 288.62 | 116 | 279.87 | 12 | 288.26 | 4 |
| 96  | 132 | 202 | 0.65 | 0.05707 | 0.00238 | 0.54204 | 0.02315 | 0.06887 | 0.00085 | 494.49 | 93  | 439.77 | 15 | 429.34 | 5 |
| 97  | 431 | 373 | 1.16 | 0.05561 | 0.00137 | 0.61662 | 0.01554 | 0.07999 | 0.00069 | 435.23 | 56  | 487.73 | 10 | 496.05 | 4 |
| 98  | 145 | 164 | 0.95 | 0.05805 | 0.00257 | 0.57972 | 0.02536 | 0.07271 | 0.00087 | 497.40 | 102 | 460.68 | 16 | 461.70 | 5 |
| 99  | 212 | 406 | 0.55 | 0.05195 | 0.00192 | 0.32563 | 0.01225 | 0.04768 | 0.00053 | 200.36 | 91  | 290.73 | 9  | 306.35 | 3 |
| 100 | 37  | 64  | 0.57 | 0.05551 | 0.00334 | 0.51964 | 0.02820 | 0.06906 | 0.00111 | 431.53 | 131 | 424.91 | 19 | 430.48 | 7 |

Sangonghe Formation (C1NL)

|    |     |     |      |         |         |          |         |         |         |         |     |         |    |         |    |
|----|-----|-----|------|---------|---------|----------|---------|---------|---------|---------|-----|---------|----|---------|----|
| 1  | 118 | 219 | 0.55 | 0.05667 | 0.00227 | 0.42826  | 0.01615 | 0.05838 | 0.00069 | 344.23  | 95  | 359.48  | 12 | 359.57  | 4  |
| 2  | 232 | 190 | 1.22 | 0.05431 | 0.00197 | 0.56448  | 0.02092 | 0.07504 | 0.00086 | 383.39  | 81  | 454.44  | 14 | 466.47  | 5  |
| 3  | 147 | 224 | 0.66 | 0.05098 | 0.00202 | 0.37101  | 0.01385 | 0.05291 | 0.00069 | 238.96  | 91  | 320.40  | 10 | 332.33  | 4  |
| 4  | 280 | 345 | 0.87 | 0.06227 | 0.00187 | 0.58792  | 0.01743 | 0.07337 | 0.00085 | 670.02  | 67  | 495.21  | 11 | 453.17  | 5  |
| 5  | 317 | 310 | 1.11 | 0.05641 | 0.00238 | 0.43180  | 0.01585 | 0.05715 | 0.00065 | 412.28  | 102 | 365.42  | 12 | 348.84  | 4  |
| 6  | 242 | 641 | 0.37 | 0.05372 | 0.00192 | 0.33339  | 0.00963 | 0.04617 | 0.00045 | 324.06  | 86  | 284.09  | 8  | 283.34  | 3  |
| 7  | 45  | 53  | 0.84 | 0.05417 | 0.00420 | 0.36676  | 0.02597 | 0.04939 | 0.00094 | 388.94  | 174 | 317.25  | 19 | 310.77  | 6  |
| 8  | 110 | 190 | 0.58 | 0.05363 | 0.00256 | 0.34955  | 0.01638 | 0.04781 | 0.00063 | 286.07  | 118 | 293.25  | 13 | 307.16  | 4  |
| 9  | 549 | 369 | 1.57 | 0.05829 | 0.00153 | 0.66204  | 0.01699 | 0.08541 | 0.00080 | 504.53  | 62  | 527.20  | 11 | 524.79  | 5  |
| 10 | 278 | 297 | 0.93 | 0.05425 | 0.00187 | 0.51558  | 0.01793 | 0.06860 | 0.00070 | 388.94  | 78  | 422.19  | 12 | 427.74  | 4  |
| 11 | 223 | 250 | 0.95 | 0.08956 | 0.00167 | 2.83948  | 0.05645 | 0.24299 | 0.00203 | 1403.51 | 37  | 1403.57 | 15 | 1395.59 | 11 |
| 12 | 68  | 439 | 0.16 | 0.20646 | 0.00407 | 13.89393 | 0.27089 | 0.51802 | 0.00442 | 2922.18 | 34  | 2831.18 | 20 | 2693.28 | 20 |
| 13 | 124 | 235 | 0.53 | 0.05185 | 0.00193 | 0.32500  | 0.01228 | 0.04519 | 0.00048 | 279.69  | 85  | 285.74  | 9  | 284.95  | 3  |
| 14 | 127 | 241 | 0.53 | 0.05030 | 0.00223 | 0.30028  | 0.01316 | 0.04349 | 0.00054 | 209.33  | 104 | 266.62  | 10 | 274.40  | 3  |
| 15 | 154 | 224 | 0.70 | 0.05965 | 0.00226 | 0.51168  | 0.02048 | 0.06744 | 0.00078 | 433.03  | 93  | 419.93  | 14 | 417.50  | 5  |
| 16 | 400 | 375 | 1.14 | 0.05187 | 0.00183 | 0.38127  | 0.01287 | 0.05298 | 0.00064 | 223.69  | 83  | 328.04  | 10 | 336.29  | 4  |
| 17 | 129 | 275 | 0.49 | 0.07208 | 0.00171 | 1.20066  | 0.02855 | 0.13381 | 0.00101 | 873.05  | 48  | 820.61  | 13 | 798.13  | 6  |
| 18 | 290 | 585 | 0.52 | 0.05427 | 0.00152 | 0.32757  | 0.00913 | 0.04628 | 0.00039 | 243.79  | 74  | 279.32  | 8  | 297.52  | 3  |
| 19 | 63  | 410 | 0.15 | 0.19477 | 0.00377 | 13.23232 | 0.26300 | 0.48870 | 0.00410 | 2783.03 | 32  | 2696.37 | 19 | 2565.03 | 18 |
| 20 | 137 | 296 | 0.49 | 0.05461 | 0.00219 | 0.39352  | 0.01412 | 0.05483 | 0.00056 | 330.97  | 95  | 339.35  | 11 | 331.84  | 3  |
| 21 | 151 | 241 | 0.63 | 0.05332 | 0.00240 | 0.33805  | 0.01407 | 0.04599 | 0.00060 | 342.65  | 104 | 295.69  | 11 | 289.87  | 4  |
| 22 | 140 | 206 | 0.68 | 0.05470 | 0.00220 | 0.49016  | 0.01751 | 0.06474 | 0.00065 | 466.71  | 91  | 405.02  | 12 | 404.40  | 4  |
| 23 | 132 | 280 | 0.47 | 0.05251 | 0.00206 | 0.37478  | 0.01371 | 0.05125 | 0.00053 | 309.32  | 89  | 323.19  | 10 | 322.17  | 3  |
| 24 | 254 | 304 | 0.85 | 0.05883 | 0.00248 | 0.54176  | 0.01982 | 0.06910 | 0.00072 | 509.29  | 90  | 440.14  | 14 | 423.41  | 4  |
| 25 | 297 | 309 | 0.98 | 0.05696 | 0.00200 | 0.55682  | 0.01901 | 0.07135 | 0.00074 | 416.17  | 83  | 443.30  | 13 | 461.96  | 5  |
| 26 | 160 | 204 | 0.78 | 0.05256 | 0.00196 | 0.44963  | 0.01618 | 0.06176 | 0.00069 | 309.32  | 79  | 377.02  | 11 | 386.31  | 4  |
| 27 | 113 | 115 | 1.08 | 0.05936 | 0.00285 | 0.45222  | 0.01977 | 0.05832 | 0.00081 | 495.88  | 110 | 380.00  | 14 | 366.07  | 5  |
| 28 | 36  | 393 | 0.09 | 0.05312 | 0.00148 | 0.46270  | 0.01303 | 0.06297 | 0.00065 | 344.50  | 31  | 386.14  | 9  | 393.66  | 4  |
| 29 | 178 | 247 | 0.72 | 0.05259 | 0.00198 | 0.45078  | 0.01625 | 0.06219 | 0.00064 | 322.28  | 81  | 377.83  | 11 | 388.96  | 4  |
| 30 | 381 | 357 | 1.07 | 0.05035 | 0.00170 | 0.35633  | 0.01203 | 0.05144 | 0.00060 | 213.04  | 78  | 309.47  | 9  | 323.36  | 4  |
| 31 | 139 | 200 | 0.70 | 0.05447 | 0.00219 | 0.47947  | 0.01909 | 0.06403 | 0.00071 | 390.79  | 91  | 397.71  | 13 | 400.10  | 4  |
| 32 | 278 | 332 | 0.88 | 0.06606 | 0.00210 | 0.55191  | 0.01813 | 0.06798 | 0.00084 | 627.52  | 66  | 472.77  | 12 | 453.68  | 5  |
| 33 | 80  | 164 | 0.49 | 0.05191 | 0.00265 | 0.33550  | 0.01708 | 0.04670 | 0.00059 | 283.40  | 117 | 293.75  | 13 | 294.20  | 4  |
| 34 | 362 | 562 | 0.67 | 0.06842 | 0.00129 | 1.19329  | 0.02251 | 0.13633 | 0.00120 | 756.40  | 43  | 832.50  | 11 | 834.18  | 7  |

|    |     |     |      |         |         |         |         |         |         |         |     |         |    |         |    |
|----|-----|-----|------|---------|---------|---------|---------|---------|---------|---------|-----|---------|----|---------|----|
| 35 | 250 | 279 | 0.95 | 0.05337 | 0.00211 | 0.36597 | 0.01419 | 0.05151 | 0.00061 | 298.07  | 96  | 317.97  | 11 | 333.44  | 4  |
| 36 | 109 | 206 | 0.53 | 0.05296 | 0.00210 | 0.39654 | 0.01496 | 0.05456 | 0.00064 | 327.84  | 89  | 339.13  | 11 | 342.44  | 4  |
| 37 | 248 | 360 | 0.73 | 0.05648 | 0.00193 | 0.37487 | 0.01340 | 0.05282 | 0.00053 | 339.66  | 86  | 331.69  | 10 | 323.20  | 3  |
| 38 | 234 | 340 | 0.69 | 0.05279 | 0.00187 | 0.35702 | 0.01241 | 0.04891 | 0.00050 | 320.43  | 81  | 309.99  | 9  | 307.81  | 3  |
| 39 | 274 | 552 | 0.50 | 0.05072 | 0.00144 | 0.30614 | 0.00887 | 0.04366 | 0.00038 | 227.85  | 69  | 271.18  | 7  | 275.48  | 2  |
| 40 | 265 | 322 | 0.82 | 0.06232 | 0.00198 | 0.52067 | 0.01760 | 0.06353 | 0.00079 | 592.00  | 62  | 459.00  | 11 | 428.00  | 5  |
| 41 | 176 | 227 | 0.78 | 0.05784 | 0.00154 | 0.61242 | 0.01619 | 0.07674 | 0.00076 | 524.11  | 62  | 485.09  | 10 | 476.64  | 5  |
| 42 | 114 | 220 | 0.55 | 0.05785 | 0.00185 | 0.69751 | 0.02113 | 0.08611 | 0.00085 | 489.47  | 71  | 545.31  | 14 | 543.48  | 5  |
| 43 | 345 | 540 | 0.64 | 0.06335 | 0.00123 | 1.13647 | 0.02186 | 0.12984 | 0.00115 | 720.38  | 41  | 770.83  | 10 | 786.96  | 7  |
| 44 | 110 | 107 | 1.03 | 0.05653 | 0.00271 | 0.41873 | 0.01883 | 0.05451 | 0.00077 | 472.27  | 106 | 355.14  | 13 | 342.12  | 5  |
| 45 | 101 | 144 | 0.70 | 0.05626 | 0.00284 | 0.50347 | 0.02395 | 0.06576 | 0.00088 | 461.16  | 113 | 414.05  | 16 | 410.54  | 5  |
| 46 | 115 | 197 | 0.58 | 0.05081 | 0.00196 | 0.36210 | 0.01421 | 0.05139 | 0.00059 | 231.55  | 91  | 313.78  | 11 | 323.06  | 4  |
| 47 | 229 | 220 | 1.05 | 0.05663 | 0.00233 | 0.40467 | 0.01583 | 0.05595 | 0.00056 | 356.74  | 93  | 354.17  | 12 | 354.85  | 4  |
| 48 | 291 | 261 | 1.12 | 0.05112 | 0.00194 | 0.32535 | 0.01206 | 0.04602 | 0.00051 | 255.62  | 82  | 286.01  | 9  | 290.05  | 3  |
| 49 | 156 | 242 | 0.71 | 0.05302 | 0.00210 | 0.38585 | 0.01468 | 0.05608 | 0.00072 | 258.07  | 96  | 330.01  | 11 | 352.27  | 5  |
| 50 | 82  | 156 | 0.54 | 0.05715 | 0.00272 | 0.39207 | 0.01597 | 0.05460 | 0.00061 | 370.59  | 117 | 341.06  | 12 | 333.47  | 4  |
| 51 | 123 | 205 | 0.62 | 0.05335 | 0.00201 | 0.37297 | 0.01535 | 0.05550 | 0.00064 | 247.76  | 93  | 332.61  | 11 | 342.45  | 4  |
| 52 | 47  | 55  | 0.91 | 0.05742 | 0.00445 | 0.38143 | 0.02675 | 0.05136 | 0.00100 | 400.61  | 188 | 339.46  | 21 | 320.09  | 6  |
| 53 | 230 | 380 | 0.60 | 0.05343 | 0.00198 | 0.35203 | 0.01078 | 0.04777 | 0.00047 | 346.35  | 83  | 306.25  | 8  | 300.79  | 3  |
| 54 | 227 | 623 | 0.36 | 0.05215 | 0.00185 | 0.30869 | 0.00926 | 0.04275 | 0.00043 | 300.06  | 81  | 273.17  | 7  | 269.85  | 3  |
| 55 | 125 | 142 | 0.96 | 0.05542 | 0.00300 | 0.39526 | 0.02028 | 0.05416 | 0.00075 | 313.12  | 130 | 340.64  | 15 | 353.50  | 5  |
| 56 | 151 | 282 | 0.54 | 0.05206 | 0.00185 | 0.40276 | 0.01499 | 0.05569 | 0.00076 | 287.10  | 81  | 343.65  | 11 | 349.35  | 5  |
| 57 | 149 | 206 | 0.74 | 0.05882 | 0.00230 | 0.49865 | 0.02043 | 0.06723 | 0.00077 | 414.24  | 94  | 417.60  | 14 | 416.11  | 5  |
| 58 | 287 | 283 | 1.05 | 0.05091 | 0.00192 | 0.33760 | 0.01303 | 0.05080 | 0.00056 | 131.61  | 94  | 295.16  | 10 | 311.11  | 4  |
| 59 | 239 | 411 | 0.65 | 0.05770 | 0.00210 | 0.36259 | 0.01154 | 0.05111 | 0.00049 | 374.06  | 86  | 321.56  | 9  | 315.83  | 3  |
| 60 | 509 | 348 | 1.46 | 0.05660 | 0.00146 | 0.62457 | 0.01603 | 0.07983 | 0.00075 | 475.97  | 57  | 492.71  | 10 | 495.09  | 4  |
| 61 | 76  | 151 | 0.51 | 0.05341 | 0.00259 | 0.37699 | 0.01479 | 0.05151 | 0.00057 | 346.35  | 111 | 324.82  | 11 | 323.76  | 4  |
| 62 | 155 | 290 | 0.57 | 0.05570 | 0.00192 | 0.43498 | 0.01589 | 0.05736 | 0.00078 | 304.33  | 86  | 367.70  | 12 | 366.81  | 5  |
| 63 | 232 | 260 | 0.89 | 0.05181 | 0.00203 | 0.35531 | 0.01378 | 0.04953 | 0.00057 | 275.99  | 91  | 308.71  | 10 | 311.63  | 4  |
| 64 | 223 | 306 | 0.78 | 0.06267 | 0.00177 | 0.70828 | 0.01973 | 0.08446 | 0.00076 | 563.41  | 60  | 553.01  | 13 | 518.46  | 5  |
| 65 | 39  | 413 | 0.10 | 0.05631 | 0.00152 | 0.49509 | 0.01355 | 0.06801 | 0.00070 | 358.28  | 32  | 405.44  | 10 | 409.41  | 4  |
| 66 | 189 | 196 | 0.96 | 0.05692 | 0.00255 | 0.38556 | 0.01633 | 0.05094 | 0.00060 | 499.38  | 103 | 333.45  | 12 | 329.85  | 4  |
| 67 | 104 | 131 | 0.80 | 0.05164 | 0.00295 | 0.34915 | 0.01874 | 0.04888 | 0.00068 | 333.39  | 131 | 304.08  | 14 | 307.64  | 4  |
| 68 | 119 | 134 | 0.89 | 0.05228 | 0.00281 | 0.37644 | 0.01932 | 0.05259 | 0.00072 | 298.21  | 122 | 324.42  | 14 | 330.38  | 4  |
| 69 | 148 | 213 | 0.72 | 0.05798 | 0.00229 | 0.52447 | 0.01891 | 0.06863 | 0.00069 | 480.71  | 94  | 425.27  | 13 | 416.54  | 4  |
| 70 | 302 | 290 | 1.04 | 0.05424 | 0.00231 | 0.39982 | 0.01510 | 0.05341 | 0.00063 | 388.94  | 94  | 341.52  | 11 | 335.42  | 4  |
| 71 | 109 | 212 | 0.52 | 0.05617 | 0.00173 | 0.65188 | 0.02013 | 0.08360 | 0.00080 | 457.45  | 67  | 509.64  | 12 | 517.60  | 5  |
| 72 | 191 | 259 | 0.77 | 0.05417 | 0.00207 | 0.48685 | 0.01674 | 0.06655 | 0.00067 | 338.39  | 83  | 396.72  | 12 | 416.18  | 4  |
| 73 | 216 | 294 | 0.74 | 0.05803 | 0.00165 | 0.65581 | 0.01915 | 0.08121 | 0.00074 | 531.52  | 56  | 512.05  | 12 | 503.36  | 4  |
| 74 | 300 | 444 | 0.72 | 0.05514 | 0.00177 | 0.40835 | 0.01374 | 0.05629 | 0.00068 | 298.58  | 82  | 338.66  | 10 | 356.97  | 4  |
| 75 | 66  | 488 | 0.14 | 0.05472 | 0.00160 | 0.45341 | 0.01293 | 0.05994 | 0.00053 | 466.71  | 60  | 379.66  | 9  | 375.27  | 3  |
| 76 | 193 | 261 | 0.81 | 0.05845 | 0.00267 | 0.41970 | 0.01600 | 0.05422 | 0.00067 | 497.88  | 112 | 352.80  | 12 | 328.41  | 4  |
| 77 | 264 | 322 | 0.82 | 0.06045 | 0.00180 | 0.57079 | 0.01660 | 0.06857 | 0.00081 | 620.39  | 65  | 458.53  | 11 | 427.52  | 5  |
| 78 | 214 | 240 | 0.89 | 0.08529 | 0.00160 | 2.73027 | 0.05227 | 0.23141 | 0.00197 | 1324.07 | 36  | 1336.73 | 14 | 1341.91 | 10 |
| 79 | 68  | 503 | 0.14 | 0.05800 | 0.00166 | 0.47608 | 0.01331 | 0.06474 | 0.00056 | 504.05  | 63  | 391.05  | 10 | 401.54  | 3  |
| 80 | 300 | 272 | 1.16 | 0.05521 | 0.00204 | 0.34487 | 0.01267 | 0.04786 | 0.00055 | 270.96  | 87  | 308.89  | 10 | 313.25  | 3  |
| 81 | 248 | 196 | 1.28 | 0.05594 | 0.00209 | 0.60964 | 0.02196 | 0.07805 | 0.00092 | 406.39  | 87  | 481.70  | 15 | 480.47  | 6  |
| 82 | 212 | 213 | 0.99 | 0.05342 | 0.00216 | 0.38540 | 0.01537 | 0.05229 | 0.00053 | 346.35  | 91  | 331.00  | 11 | 328.56  | 3  |
| 83 | 113 | 137 | 0.83 | 0.05525 | 0.00319 | 0.37359 | 0.01930 | 0.05084 | 0.00072 | 346.73  | 135 | 313.20  | 15 | 319.95  | 4  |
| 84 | 184 | 242 | 0.76 | 0.05675 | 0.00259 | 0.39224 | 0.01553 | 0.05020 | 0.00062 | 483.38  | 106 | 336.00  | 11 | 315.77  | 4  |
| 85 | 189 | 241 | 0.83 | 0.06131 | 0.00166 | 0.65529 | 0.01732 | 0.08135 | 0.00078 | 560.80  | 65  | 519.04  | 11 | 500.47  | 5  |
| 86 | 145 | 215 | 0.67 | 0.05523 | 0.00219 | 0.48271 | 0.01914 | 0.06362 | 0.00076 | 420.42  | 89  | 399.93  | 13 | 397.62  | 5  |
| 87 | 133 | 133 | 1.00 | 0.05343 | 0.00251 | 0.36551 | 0.01679 | 0.04968 | 0.00067 | 346.35  | 106 | 316.32  | 12 | 312.54  | 4  |
| 88 | 106 | 149 | 0.72 | 0.05907 | 0.00304 | 0.52361 | 0.02539 | 0.07102 | 0.00095 | 474.99  | 116 | 434.75  | 17 | 443.38  | 6  |
| 89 | 266 | 269 | 0.99 | 0.04849 | 0.00186 | 0.31552 | 0.01229 | 0.04704 | 0.00053 | 124.16  | 89  | 278.45  | 9  | 296.30  | 3  |
| 90 | 175 | 189 | 0.93 | 0.05473 | 0.00236 | 0.36720 | 0.01512 | 0.04898 | 0.00057 | 466.71  | 96  | 317.57  | 11 | 308.27  | 3  |
| 91 | 103 | 183 | 0.56 | 0.05156 | 0.00244 | 0.32366 | 0.01516 | 0.04554 | 0.00060 | 264.88  | 109 | 284.71  | 12 | 287.07  | 4  |
| 92 | 142 | 139 | 1.03 | 0.05503 | 0.00266 | 0.39109 | 0.01763 | 0.05266 | 0.00070 | 360.20  | 109 | 328.97  | 13 | 334.42  | 4  |

|     |     |     |      |         |         |         |         |         |         |        |     |        |    |        |   |
|-----|-----|-----|------|---------|---------|---------|---------|---------|---------|--------|-----|--------|----|--------|---|
| 93  | 286 | 411 | 0.70 | 0.05202 | 0.00168 | 0.37810 | 0.01272 | 0.05261 | 0.00064 | 287.10 | 79  | 325.64 | 9  | 330.53 | 4 |
| 94  | 240 | 295 | 0.81 | 0.05657 | 0.00231 | 0.51109 | 0.01906 | 0.06519 | 0.00068 | 475.97 | 86  | 419.18 | 13 | 407.13 | 4 |
| 95  | 85  | 170 | 0.51 | 0.05399 | 0.00275 | 0.35227 | 0.01793 | 0.04996 | 0.00061 | 306.07 | 121 | 311.38 | 14 | 314.79 | 4 |
| 96  | 131 | 261 | 0.55 | 0.05332 | 0.00232 | 0.30929 | 0.01369 | 0.04566 | 0.00058 | 226.08 | 112 | 274.62 | 11 | 290.87 | 4 |
| 97  | 125 | 265 | 0.47 | 0.06674 | 0.00163 | 1.14348 | 0.02693 | 0.12390 | 0.00096 | 831.48 | 45  | 774.16 | 13 | 752.96 | 6 |
| 98  | 172 | 221 | 0.80 | 0.05466 | 0.00211 | 0.48111 | 0.01683 | 0.06423 | 0.00074 | 330.97 | 85  | 388.33 | 12 | 397.90 | 5 |
| 99  | 132 | 252 | 0.55 | 0.05496 | 0.00204 | 0.34125 | 0.01290 | 0.04791 | 0.00052 | 302.07 | 90  | 302.89 | 10 | 307.75 | 3 |
| 100 | 158 | 253 | 0.68 | 0.05598 | 0.00255 | 0.36172 | 0.01449 | 0.04737 | 0.00062 | 370.06 | 111 | 304.57 | 11 | 313.05 | 4 |
